1 **Running Title:** Natural SARS-CoV-2 infection in ferrets

2 **Keywords:** Coronavirus, *Mustela putorius furo*, Natural infection, Pets, Work animals,

3 Zoonosis.

4

5 **Natural SARS-CoV-2 infection in kept ferrets, Spain**

6 **Authors:** Christian Gortázar<sup>1</sup>, Sandra Barroso-Arévalo<sup>2</sup>, Elisa Ferreras-Colino<sup>1</sup>, Julio Isla<sup>3</sup>,

7 Gabriela de la Fuente<sup>3</sup>, Belén Rivera<sup>2</sup>, Lucas Domínguez<sup>2</sup>, José de la Fuente<sup>1,4</sup>, José M. Sánchez-

8 Vizcaíno<sup>2</sup>

9

10 **Affiliations:**

11 1.- SaBio Instituto de Investigación en Recursos Cinegéticos IREC (CSIC-UCLM), Ciudad Real,

12 Spain (C. Gortázar, E. Ferreras-Colino, J. de la Fuente)

13 2.- Universidad Complutense de Madrid. VISAVET Center. Avda de Puerta de Hierro s/n, 28040

14 Madrid, Spain (J.M. Sánchez-Vizcaíno, L. Domínguez, S. Barroso. B.Rivera)

15 3.- Sabiotec, Ciudad Real, Spain (J. Isla, G. de la Fuente)

16 4.- Oklahoma State University, Stillwater, Oklahoma, USA (J. de la Fuente)

17

18

19 **Abstract**

20 We found SARS-CoV-2 RNA in 6 of 71 ferrets (8.4%) and isolated the virus from one

21 rectal swab. Natural SARS-CoV-2 infection does occur in kept ferrets, at least under

22 circumstances of high viral circulation in the human population. However, small ferret

23 collections are probably unable to maintain prolonged virus circulation.

24 **Text**

25 Natural infection of animals with severe acute respiratory syndrome coronavirus 2  
26 (SARS-CoV-2) has been reported in pet cats and dogs, zoo felids, and mustelids belonging to the  
27 subfamily mustelinae [1]. Among mustelids, natural SARS-CoV-2 infections have been recorded  
28 in farmed American mink (*Neovison vison*), and sporadically in a wild mink sampled close to an  
29 infected farm in Utah<sup>1</sup> and in a kept pet ferret (*Mustela putorius furo*) from an infected  
30 household in Slovenia<sup>2</sup>. Ferrets are common laboratory models and experimental infections have  
31 evidenced their susceptibility and ability to transmit the virus to other ferrets. SARS-CoV-2 is  
32 shed up to 8 days post-infection (dpi) in nasal washes, saliva, urine, and feces and is effectively  
33 transmitted to naive ferrets by direct contact and via the air [2, 3]. Experimentally infected ferrets  
34 display either no clinical signs or exhibit elevated body temperature and loss of appetite [2, 4].

35 Ferrets are common pets<sup>3,4,5</sup>, and are also used as work animals for rabbit control.  
36 However, it remains unknown if SARS-CoV-2 circulates among kept ferret populations and if  
37 ferrets, like farmed mink, could contribute to virus maintenance.

38 **The Study**

39 We studied 71 ferrets belonging to seven owners and used as working animals for rabbit  
40 hunting in Ciudad Real province, central Spain. Group sizes ranged from four to 21 (mean 10).  
41 Twenty ferrets belonging to groups 1 and 2 were re-sampled 66 days after initial sampling.  
42 Sampling took place between August and November 2020. Animal sampling procedures had  
43 been approved by the Madrid Animal Research Ethics Committee, ref. CM14/2020. One  
44 oropharyngeal and one rectal swab (DeltaSwab® Virus 3ml, Deltalab S.L., Rubí, Spain) were  
45 taken from each ferret for RNA extraction.

46 SARS-CoV-2-specific RNA was detected using a RT-qPCR assay. Briefly, RNA was  
47 extracted using the KingFisher Flex System (Thermo Fisher, Waltham, MA, USA) according to  
48 the manufacturer instructions. Detection of SARS-CoV-2 RNA was performed using the  
49 envelope protein (E)-encoding gene and two targets (IP2 and IP4) of the RNA-dependent RNA  
50 polymerase gene (RdRp) in an RT-PCR protocol established by the WHO according to the  
51 guidelines ([https://www.who.int/emergencies/diseases/novel-coronavirus-2019/technical-](https://www.who.int/emergencies/diseases/novel-coronavirus-2019/technical-guidance/laboratory-guidance)  
52 [guidance/laboratory-guidance](https://www.who.int/emergencies/diseases/novel-coronavirus-2019/technical-guidance/laboratory-guidance)) [5, 6]. Primer sets used are detailed in Table 1. The RT-qPCR  
53 was carried out using the SuperScript III Platinum One-Step RT-qPCR Kit (ThermoFisher,  
54 Massachusetts, USA), according to the manufacturer's protocol on a CFX Connect™Real-Time  
55 PCR Detection System (BioRad, Berkeley, USA). The positive control for real-time RT-qPCR  
56 was an *in vitro* transcribed RNA derived from the strain BetaCoV\_Wuhan\_WIV04\_2019  
57 (EPI\_ISL\_402124), loaned by the Pasteur Institute (Paris, France). Nuclease-free water was used  
58 as negative control. A cycle threshold (Ct) cut-off of 40 cycles was used. A result was considered  
59 positive when the sample showed a positive RT-qPCR for at least two of the three analyzed  
60 targets.

61 Specimens considered positive by RT-qPCR were subjected to virus isolation in Vero E6  
62 cells. Cells were cultured in RPMI 1640 medium supplemented with 10% fetal bovine serum  
63 (FBS; Gibco, Madrid, Spain), 100 IU/ml penicillin, and 100 µg/ml streptomycin. Cells were  
64 seeded in 96-well culture plates and cultured at 37°C with 5% CO<sub>2</sub> for 24 to 48 h. Then, cells  
65 were inoculated with 10 µl of the direct sample (oronasal or fecal swabs). Mock-inoculated cells  
66 were used as negative controls. Cultured cells were maintained at 37 °C with 5% CO<sub>2</sub>, with a  
67 daily observation of virus-induced cytopathic effect (CPE) and cellular death. After 6 days, cell  
68 cultures were frozen, thawed, and subjected to three passages with inoculation of fresh Vero E6

69 cells with the lysates as described above. SARS-CoV-2 molecular detection was performed by  
70 RT-qPCR on the supernatants from every passage to confirm the presence/absence of the virus in  
71 the cell culture.

72 We found SARS-CoV-2 RNA in swab samples from 6 of 71 ferrets (8.4%) (Table 2),  
73 belonging to four of seven investigated groups (57%). The likelihood of a swab testing positive  
74 was unrelated with age class (under or over one year-old), sex and oral/rectal sample origin  
75 (Fisher's two-tailed p values >0.2). RT-qPCR results were confirmed by sequencing the positive  
76 PCR product. None of the 20 re-sampled ferrets was PCR-positive, including one individual that  
77 had tested positive two months earlier (oropharyngeal swab; Ct = 35.38).

78 SARS-CoV-2 was isolated only from the rectal swab of one ferret (Ct in the original  
79 sample = 34.5). Cell culture showed CPE and cellular death in the three passages. Virus recovery  
80 was also confirmed by RT-qPCR (Ct value reduction from original inoculum to cell suspension  
81 of third passage).

82 We conclude that natural SARS-CoV-2 infection in kept ferrets does occur in  
83 circumstances of high viral circulation in the human population [7]. However, the high Ct values  
84 observed, and the lack of positive ferrets at re-sampling, indicate that small ferret populations are  
85 not as able to maintain prolonged virus circulation as large, farmed mink populations [8].

86 Specific guidance on SARS-CoV-2 in ferrets has been made available in the UK<sup>6</sup>.

87

## 88 **Acknowledgments**

89 This study received funding from ISCIII, Spanish Government, grant number:  
90 COV20/01385 and EFC was supported by a grant from Universidad de Castilla-La Mancha,  
91 Spain.

92 **Conflicts of interest**

93 The authors have no conflicts of interest to declare.

94 **Author Bio**

95 Professor Christian Gortázar heads the SaBio research group at the Spanish Wildlife  
96 Research Institute (IREC). His research interests include the epidemiology and control of  
97 infections shared between wildlife, livestock, and human beings.

98 **Footnotes**

99 <sup>1</sup> <https://promedmail.org/promed-post/?id=8015608>.

100 <sup>2</sup> [https://www.oie.int/wahis\\_2/public/wahid.php/Reviewreport/Review?page\\_refer=MapFullEven](https://www.oie.int/wahis_2/public/wahid.php/Reviewreport/Review?page_refer=MapFullEven)  
101 [tReport&reportid=37289](https://www.oie.int/wahis_2/public/wahid.php/Reviewreport/Review?page_refer=MapFullEven).

102 <sup>3</sup> [https://www.vettimes.co.uk/app/uploads/wp-post-to-pdf-enhanced-cache/1/overview-of-ferrets-](https://www.vettimes.co.uk/app/uploads/wp-post-to-pdf-enhanced-cache/1/overview-of-ferrets-part-one-conditions-and-behaviour.pdf)  
103 [part-one-conditions-and-behaviour.pdf](https://www.vettimes.co.uk/app/uploads/wp-post-to-pdf-enhanced-cache/1/overview-of-ferrets-part-one-conditions-and-behaviour.pdf).

104 <sup>4</sup> <https://www.avma.org/resources-tools/reports-statistics/us-pet-ownership-statistics>.

105 <sup>5</sup> [https://www.mapa.gob.es/es/ganaderia/temas/produccion-y-mercados-](https://www.mapa.gob.es/es/ganaderia/temas/produccion-y-mercados-ganaderos/20160222_informeestudioparapublicar_tcm30-104720.pdf)  
106 [ganaderos/20160222\\_informeestudioparapublicar\\_tcm30-104720.pdf](https://www.mapa.gob.es/es/ganaderia/temas/produccion-y-mercados-ganaderos/20160222_informeestudioparapublicar_tcm30-104720.pdf)

107 <sup>6</sup> <http://apha.defra.gov.uk/documents/guidance-sars-cov-2-ferrets.pdf>

108 **References**

109 1. Delahay RJ, de la Fuente J, Smith GC, Sharun K, Snary El, Flores-Girón L, et al.  
110 Assessing the risks of SARS-CoV-2 in Wildlife. Preprints 2020; 2020120283.

111 2. Kim Y-I, Kim S-G, Kim S-M, Kim E-H, Park S-J, Yu K-M, et al. Infection and Rapid  
112 Transmission of SARS-CoV-2 in Ferrets. Cell Host & Microbe 2020;27:704–709.

- 113 3. Richard M, Kok A, de Meulder D, Bestebroer TM, Lamers MM, Okba NMA, et al.  
114 SARS-CoV-2 is transmitted via contact and via the air between ferrets. Nature  
115 Communications 2020;11:3496.
- 116 4. Shi J, Wen Z, Zhong G, Yang H, Wang C, Huang B, et al. Susceptibility of ferrets, cats,  
117 dogs, and other domesticated animals to SARS–coronavirus 2. Science 2020;368:1016–  
118 1020.
- 119 5. Corman VM, Landt O, Kaiser M, Molenkamp R, Meijer A, Chu DK, et al. Detection of  
120 2019 novel coronavirus (2019-nCoV) by real-time RT-PCR. Eurosurveillance 2020;25:  
121 2000045.
- 122 6. Grenga L, Gallais F, Pible O, Gaillard JC, Gouveia D, Batina H, et al. Shotgun  
123 proteomics of SARS-CoV-2 infected cells and its application to the optimization of  
124 whole viral particle antigen production for vaccines. Emerging Microbes & Infections  
125 2020;9:1712–1721.
- 126 7. Fernández-de-Mera IG, Rodríguez del-Río FJ, de la Fuente J, Pérez-Sancho M, Hervás  
127 D, Moreno I, et al. Detection of environmental SARS-CoV-2 RNA in a high prevalence  
128 setting in Spain. Transboundary and Emerging Diseases 2020 Sep 7. doi:  
129 10.1111/tbed.13817. Epub ahead of print.
- 130 8. Koopmans M. SARS-CoV-2 and the human-animal interface: outbreaks on mink farms.  
131 The Lancet Infectious Diseases 2021;21:18-19.

132

133 Address for correspondence: Christian Gortázar, SaBio research group at IREC Instituto de  
134 Investigación en Recursos Cinegéticos (CSIC-UCLM), Ronda de Toledo 12, 13003 Ciudad  
135 Real, Spain. email: [christian.gortazar@uclm.es](mailto:christian.gortazar@uclm.es)

136 Table 1. Primer sequences and amplified fragment sizes in base pairs.

| <b>Primer target</b> | <b>Sequence 5'–3'</b>      | <b>PCR fragment size</b> |
|----------------------|----------------------------|--------------------------|
| Gene RdRp/ nCoV_IP2  |                            |                          |
| nCoV_IP2–12669Fw     | ATGAGCTTAGTCCTGTTG         | 108 bp                   |
| nCoV_IP2–12759Rv     | CTCCCTTTGTTGTGTTGT         |                          |
| nCoV_IP2–12696b      | AGATGTCTTGTGCTGCCGGTA      |                          |
| Probe (+)            | [5']Hex [3']BHQ–1          |                          |
| Gene RdRp/ nCoV_IP4  |                            |                          |
| nCoV_IP4–14059Fw     | GGTAACTGGTATGATTTCG        | 107 bp                   |
| nCoV_IP4–14146Rv     | CTGGTCAAGGTTAATATAGG       |                          |
| nCoV_IP4–14084       | TCATACAAACCACGCCAGG        |                          |
| Probe(+)             | [5']Fam [3']BHQ–1          |                          |
| Gene E/ E_Sarbeco    |                            |                          |
| E_Sarbeco_F1         | ACAGGTACGTTAATAGTTAATAGCGT | 125 bp                   |
| E_Sarbeco_R2         | ATATTGCAGCAGTACGCACACA     |                          |
| E_Sarbeco_P1         | ACACTAGCCATCCTTACTGCGCTTCG |                          |
|                      | [5']Fam [3']BHQ–1          |                          |

137

138

139 Table 2. RT-qPCR positive results by sample type.

| <b>Animal ID</b> | <b>Sample type</b> | <b>Ct value</b> |
|------------------|--------------------|-----------------|
| G1-H6            | Rectal swab        | 34.5            |
| G1-H17           | Nasal swab         | 37.29           |
| G2-H5            | Nasal swab         | 35.38           |
| G5-H11           | Nasal swab         | 39.83           |
| G7-H7            | Nasal swab         | 30.59           |
| G7-H9            | Nasal swab         | 38.91           |

140
